# Supplementary material
Source: Springer Nature journal article supplement (https://www.springermedizin.de/resource/supplementary/12889_2008_1258_MOESM1_ESM.pdf/9502800)

# ALL TOWNS

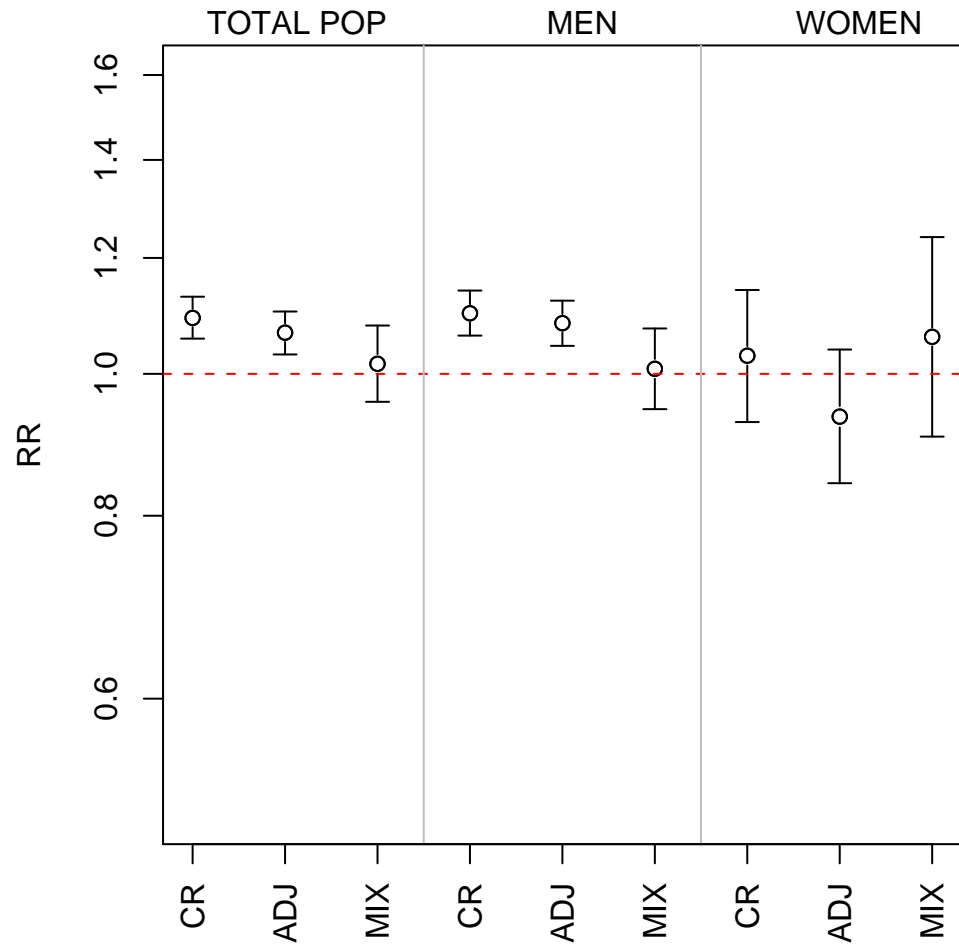

# TOWNS <10,000 INHAB

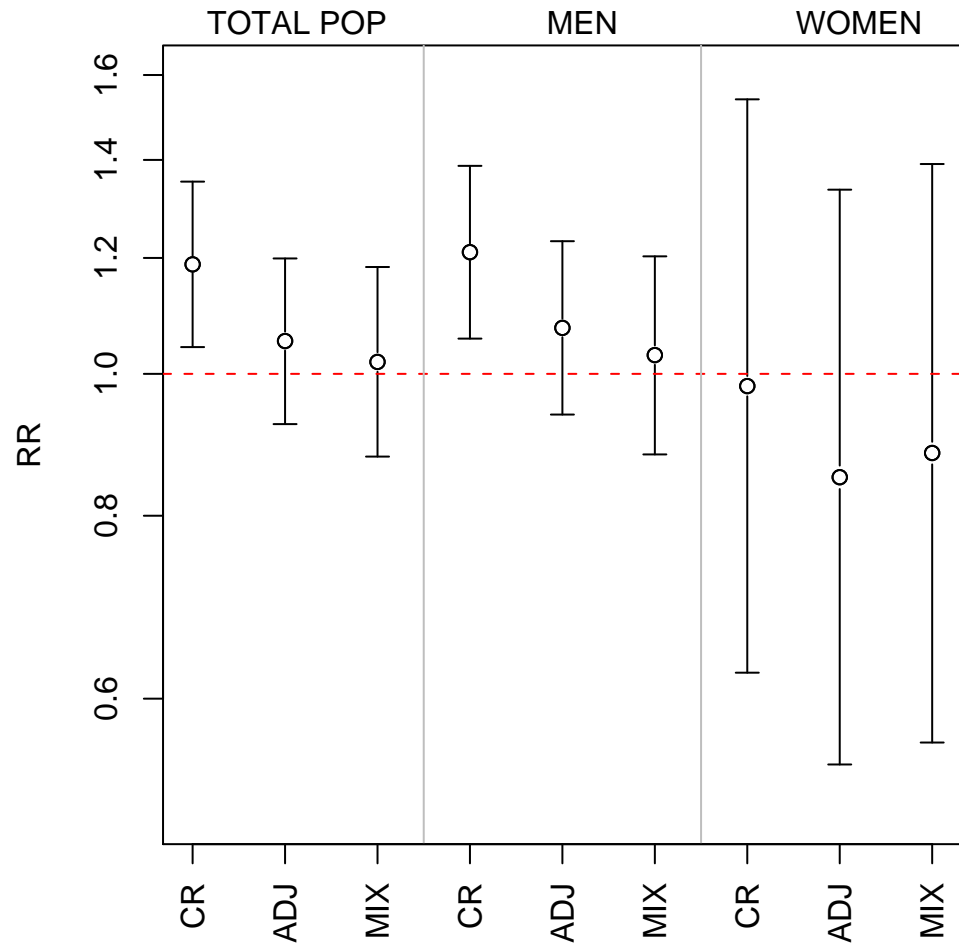

Supplement: MOESM1 [file 9502800]
